# Supplementary material for: Airway management in “tubeless” spontaneous-ventilation video-assisted thoracoscopic tracheal surgery: A Retrospective Observational Case Series Study
Source: Research Square preprint supplement (doi:10.21203/rs.3.rs-1243418/v1), 2022-05-24
Supplement: Supplementary file 1 [file 43da84a9209d40abbad88b03.docx]

| **Patient** | **Airway management** | **Change of airway management** | **Resection-Phase** | **Local anesthesia** | **Neuromuscular blocker use** | **Surgery time(min)** | **Anesthesia time(min)** | **Preoperative PO2** | **Preoperative PCO2** | **Preoperative Lac** | **APACHE 2 score** | **ICU stay** | **Postoperative complications** |
| --- | --- | --- | --- | --- | --- | --- | --- | --- | --- | --- | --- | --- | --- |
| 1 | LMA | No | SRA | 1 | ≥1 ED95 | 180 | 240 | 90 | 42 | 1.8 | 5 | 1 |  |
| 2 | LMA | No | SRA | 1 | 0 | 192 | 318 | 79 | 51.7 | 1.07 | 4 | 1 |  |
| 3 | LMA | CRO | SIMV | 1 | 0 | 300 | 420 | 90.2 | 42.5 | 1.77 | 4 | 1 |  |
| 4 | LMA | No | SRA | 2 | ≥1 ED95 | 240 | 396 | 139.6 | 38.1 | 1.2 | 4 | 1 |  |
| 5 | SLE | CRO | SIMV | 1 | 0 | 120 | 240 | 78.6 | 38.7 | 2.66 | 14 | 1 |  |
| 6 | LMA | No | SRA | 1 | 0 | 264 | 342 | 163 | 38 | 1.69 | 5 | 1 |  |
| 7 | LMA | No | SRA | 2 | ≥1 ED95 | 258 | 312 | 121 | 43 | 1.35 | 0 | 1 |  |
| 8 | LMA | No | SRA | 1 | ≥1 ED95 | 300 | 540 | 159 | 27 | 1.5 | 5 | 1 |  |
| 9 | LMA | HFJV | HFJV | 1 | ≥1 ED95 | 270 | 276 | 67.9 | 33.6 | 1.5 | 12 | 1 |  |
| 10 | LMA | No | SRA | 1 | 0 | 162 | 276 | 88.4 | 41.6 | 1.6 | 6 | 1 |  |
| 11 | SLE | CRO | SIMV | 1 | ≥1 ED95 | 516 | 540 | 88.4 | 42.3 | 1.87 | 2 | 6 | Anastomosis dehiscence |
| 12 | SLE | No | SRA | 1 | ≥1 ED95 | 210 | 360 | 81.4 | 45.3 | 1.54 | 6 | 2 | Atrial fibrillation |
| 13 | LMA | HFJV AND CRO | HFJV | 1 | ≥1 ED95 | 348 | 450 | 66.1 | 42.4 | 2.86 | 4 | 1 |  |
| 14 | SLE | HFJV | HFJV | 1 | ≥1 ED95 | 168 | 258 | 126.2 | 42.6 | 1.01 | 6 | 1 |  |
| 15 | LMA | No | SRA | 1 | 0 | 198 | 300 | 144.5 | 41.7 | 1.1 | 5 | 1 |  |
| 16 | LMA | No | SRA | 1 | 0 | 318 | 408 | 167 | 41.8 | 0.93 | 9 | 1 |  |
| 17 | LMA | No | SRA | 1 | 0 | 222 | 318 | 79.1 | 44.8 | 1.05 | 4 | 2 |  |
| 18 | LMA | No | SRA | 1 | ≥1 ED95 | 234 | 318 | 145.8 | 40.2 | 1.17 | 2 | 1 |  |
| 19 | LMA | No | SRA | 1 | 0 | 228 | 312 | 167 | 41.8 | 0.93 | 0 | 1 |  |
| 22 | LMA | No | SRA | 1 | 0 | 192 | 318 | 97.9 | 41.3 | 1.01 | 2 | 1 |  |
| 23 | LMA | No | SRA | 1 | 0 | 192 | 300 | 145 | 41.7 | 1.11 | 5 | 1 |  |
| 24 | SLE | HFJV | HFJV | 1 | 0 | 270 | 384 | 68.4 | 44 | 1.86 | 4 | 1 |  |
| 26 | LMA | No | SRA | 1 | ≥1 ED95 | 276 | 390 | 106 | 44.9 | 0.94 | 3 | 1 |  |
| 27 | LMA | CRO | SIMV | 1 | ≥1 ED95 | 330 | 438 | 79.4 | 44.2 | 1.73 | 5 | 1 |  |
| 28 | LMA | No | SRA | 1 | 0 | 162 | 246 | 138.9 | 47.8 | 0.83 | 1 | 1 |  |
| 29 | LMA | No | SRA | 1 | 0 | 360 | 480 | 96.2 | 43.1 | 2.51 | 5 | 2 |  |
| 30 | SLE | No | SRA | 1 | 0 | 354 | 444 | 85.3 | 36.7 | 1.36 | 4 | 2 |  |
| 32 | LMA | No | SRA | 1 | 0 | 240 | 330 | 90.1 | 42.8 | 1.41 | 0 | 0 |  |
| 33 | LMA | HFJV | HFJV | 1 | 0 | 294 | 402 | 92.7 | 47.5 | 3.15 | 1 | 2 |  |
|  |  |  |  |  |  |  |  |  |  |  |  |  |  |
