# Supplementary material for: Airway management in “tubeless” spontaneous-ventilation video-assisted thoracoscopic tracheal surgery: A Retrospective Observational Case Series Study
Source: Research Square preprint supplement (doi:10.21203/rs.3.rs-1243418/v1), 2022-05-24
Supplement: Supplementary file 2 [file f446a3c1145f7ffa25d7d239.docx]

| **Patient** | **Sex** | **Age** | **Height** | **Body weight** | **BMI** | **Comorbidity** | **Smoking history** | **Preoperative treatment** | **Beginning distance below the glottis（mm）** | **Sectional area of the tumor within trachea（%）** | **Transverse diameter of airway stenosis** |
| --- | --- | --- | --- | --- | --- | --- | --- | --- | --- | --- | --- |
| 1 | Male | 25 | 170 | 59 | 20.4 | No | Yes，2 years | Resection with bronchoscopy | 60 | 26.83 | 9 |
| 2 | Female | 58 | 154 | 48 | 20.2 | Diabete | No | Bronchoscopy | 80 | 72.73 | 6 |
| 3 | Male | 37 | 169 | 70 | 24.5 | No | No | Resection with bronchoscopy | 70 | 36.05 | 11 |
| 4 | Male | 20 | 163 | 56 | 21.1 | No | No | Bronchoscopy | 44 | 32.19 | 9.9 |
| 5 | Female | 74 | 156 | 60 | 24.7 | COPD | No | Bronchoscopy | 75 | 46.05 | 8.2 |
| 6 | Female | 48 | 160 | 48 | 18.7 | Gastritis | No | Bronchoscopy | 72 | 85.33 | 6 |
| 7 | Female | 31 | 170 | 55 | 19.0 | No | No | Bronchoscopy | 75 | 86.49 | 4 |
| 8 | Female | 40 | 160 | 57 | 22.3 | Epilepsy | No | Bronchoscopy | 86 | 77.30 | 3.7 |
| 9 | Male | 72 | 167 | 52 | 18.6 | No | No | Bronchoscopy | 88 | 69.14 | 7.5 |
| 10 | Female | 44 | 152 | 50 | 21.6 | No | No | Resection with bronchoscopy | 78 | 10.83 | 10.7 |
| 11 | Female | 37 | 160 | 50 | 19.5 | No | No | Bronchoscopy | 60 | 77.94 | 3 |
| 12 | Male | 62 | 155 | 50 | 20.8 | COPD | No | Bronchoscopy | 50 | 44.72 | 11 |
| 13 | Male | 48 | 166 | 82 | 29.8 | No | No | Resection with bronchoscopy | 90 | 41.50 | 2 |
| 14 | Female | 31 | 156 | 68 | 27.9 | No | No | Resection with bronchoscopy | 69 | 70.20 | 4.5 |
| 15 | Male | 50 | 165 | 75 | 27.5 | No | NO | Bronchoscopy | 90 | 17.40 | 19 |
| 16 | Male | 36 | 169 | 70 | 24.5 | NO | NO | Resection with bronchoscopy | 70 | 36.00 | 3.6 |
| 17 | Male | 54 | 170 | 43 | 14.9 | NO | YES | Bronchoscopy | 94 | 48.24 | 20 |
| 18 | Male | 52 | 165 | 64 | 23.5 | NO | NO | Bronchoscopy | 88 | 25.92 | 24 |
| 19 | Male | 36 | 169 | 70 | 24.5 | NO | NO | Bronchoscopy | 108 | 25.71 | 18 |
| 22 | Male | 41 | 160 | 64 | 25 | NO | NO | Resection with bronchoscopy | 78 | 66.67 | 17 |
| 23 | Male | 50 | 165 | 75 | 27.6 | NO | NO | Bronchoscopy | 100 | 22.72 | 20 |
| 24 | Female | 53 | 151 | 58 | 25.4 | NO | NO | Resection with bronchoscopy | 82 | 70 | 8 |
| 26 | Female | 40 | 165 | 63 | 23.1 | NO | NO | Bronchoscopy | 82 | 24.86 | 13 |
| 27 | Male | 57 | 162 | 59 | 22.5 | Cerebral infarction | NO | Bronchoscopy | 76 | 18.8 | 20 |
| 28 | Female | 31 | 160 | 46 | 17.9 | NO | NO | Bronchoscopy | 91 | 61.11 | 2 |
| 29 | Male | 40 | 175 | 85 | 27.8 | Asthma,smoking 10 years | YES，10 | Bronchoscopy | 86 | 27.47 | 10 |
| 30 | Male | 50 | 170 | 85 | 29.4 | Hypertension | NO | Bronchoscopy | 89 | 72.73 | 15 |
| 32 | Male | 31 | 165 | 62 | 22.8 | Hepatitis B | NO | Bronchoscopy | 91 | 25 | 7 |
| 33 | Male | 38 | 190 | 94 | 26 | NO | NO | Bronchoscopy | 94 | 57.14 | 26 |
|  |  |  |  |  |  |  |  |  |  |  |  |
